# Supplementary material for: Response of a chemo-resistant triple-negative breast cancer patient to a combination of p62-encoding plasmid, Elenagen, and CMF chemotherapy
Source: PubMed Central journal article supplement (PMC6980632; doi:10.18632/oncotarget.27323), 2020-01-21
Supplement: oncotarget-11-294-s001.pdf [file oncotarget-11-294-s001.pdf]

## Response of a chemo-resistant triple-negative breast cancer patient to a Combination of p62-encoding plasmid, Elenagen, and CMF chemotherapy

### SUPPLEMENTARY MATERIALS

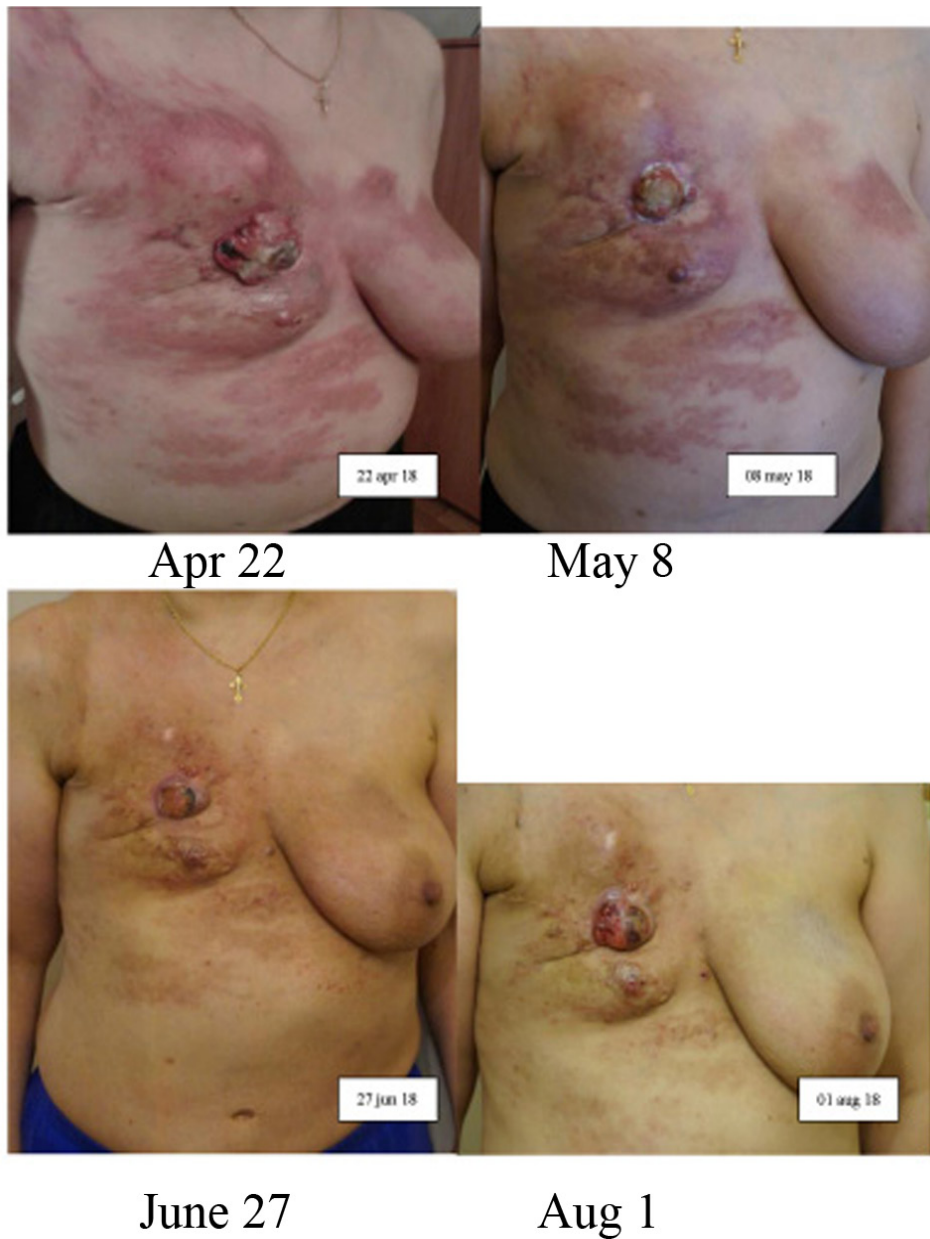

**Supplementary Figure 1: Dynamics of tumor growth and skin lesions before and during treatment with Elenagen+CMF chemotherapy. Apr 22, 2018 – before treatment, May 2- Aug 1 – during treatment.**
